## RESEARCH ARTICLE

# Tissue-specific expression of 11 $\beta$ -HSD and its effects on plasma corticosterone during the stress response

Jonathan H. Pérez<sup>1,2,3,\*</sup>, Ryan E. Swanson<sup>1</sup>, Hannah J. Lau<sup>1</sup>, Jeffrey Cheah<sup>1</sup>, Valerie R. Bishop<sup>3</sup>, Katherine R. S. Snell<sup>4</sup>, Angus M. A. Reid<sup>3,5</sup>, Simone L. Meddle<sup>3</sup>, John C. Wingfield<sup>1</sup> and Jesse S. Krause<sup>1</sup>

## ABSTRACT

The hypothalamic–pituitary–adrenal (HPA) axis is under complex regulatory control at multiple levels. Enzymatic regulation plays an important role in both circulating levels of glucocorticoids and target tissue exposure. Three key enzyme pathways are responsible for the immediate control of glucocorticoids. *De novo* synthesis of glucocorticoid from cholesterol involves a multistep enzymatic cascade. This cascade terminates with 11 $\beta$ -hydroxylase, responsible for the final conversion of 11-deoxy precursors into active glucocorticoids. Additionally, 11 $\beta$ -hydroxysteroid dehydrogenase type 1 (11 $\beta$ -HSD1) controls regeneration of glucocorticoids from inactive metabolites, providing a secondary source of active glucocorticoids. Localized inactivation of glucocorticoids is under the control of Type 2 11 $\beta$ -HSD (11 $\beta$ -HSD2). The function of these enzymes is largely unexplored in wild species, particularly songbirds. Here, we investigated the contribution of both clearance and generation of glucocorticoids to regulation of the hormonal stress response via the use of pharmacological antagonists. Additionally, we mapped 11 $\beta$ -HSD gene expression. We found 11 $\beta$ -HSD1 primarily in liver, kidney and adrenal glands, although it was detectable across all tissue types. 11 $\beta$ -HSD2 was predominately expressed in the adrenal glands and kidney with moderate gonadal and liver expression. Inhibition of glucocorticoid generation by metyrapone was found to decrease levels peripherally, while both peripheral and central administration of the 11 $\beta$ -HSD2 inhibitor DETC resulted in elevated concentrations of corticosterone. These data suggest that during the stress response, peripheral antagonism of the 11 $\beta$ -HSD system has a greater impact on circulating glucocorticoid levels than central control. Further studies should aim to elucidate the respective roles of the 11 $\beta$ -HSD and 11 $\beta$ -hydroxylase enzymes.

**KEY WORDS:** Glucocorticoid, Corticosterone, Hypothalamic–pituitary–adrenal axis, HPA axis, 11 $\beta$ -HSD, Negative feedback, Songbird, Stress

## INTRODUCTION

Glucocorticoids are critical for physiological responses to environmental (both external and internal) perturbations. Faced

with an acute stressor such as a food shortage, inclement weather or predators, the organism responds by increasing the synthesis of glucocorticoids from the adrenal glands, giving rise to the classic ‘stress response’. In the short term, elevation of glucocorticoids is adaptive, promoting changes in physiology and behavior to enhance survival (e.g. Sapolsky et al., 2000; Romero, 2002; Krause et al., 2017). As prolonged or chronic elevation of glucocorticoids can result in a number of pathological conditions, the homeostatic regulation of glucocorticoid levels is essential for maximizing fitness.

Regulation of glucocorticoid synthesis and secretion in response to stressors begins with the integration of internal and external cues by the brain. Ultimately, cells in the paraventricular nucleus (PVN) of the hypothalamus are stimulated, causing the release of corticotropin-releasing factor (CRF) and arginine vasopressin or arginine vasotocin depending on the species (e.g. Joëls et al., 2008). CRF triggers the release of adrenocorticotrophic hormone (ACTH) from the corticotroph cells in the anterior pituitary gland into the systemic circulation. ACTH then acts to stimulate increased synthesis of glucocorticoids in the adrenal glands. Glucocorticoids not only signal to target cells but also provide negative feedback to the hypothalamo–pituitary–adrenal (HPA) axis, regulating further activation of the HPA axis and ultimately returning plasma hormone levels to baseline. These actions occur through two classes of receptors: the high-affinity mineralocorticoid receptors (MRs) and low-affinity glucocorticoid receptors (GRs). GRs tend to be bound at high circulating levels of glucocorticoids such as those encountered during a stress response, so GRs are considered to be the primary mediator of stress effects and negative feedback (Reul et al., 1987). Glucocorticoid signaling generates negative feedback by binding to CRF neurons in the PVN as well as blocking hippocampal signaling to the CRF neurons, thus reducing CRF release and inhibiting ACTH release through binding at corticotrophs in the anterior pituitary gland (de Kloet, 2014). Recent work has suggested a short negative feedback loop within the adrenal gland itself, with locally produced glucocorticoids serving to suppress further glucocorticoid synthesis as levels rise (Walker et al., 2015). Thus, negative feedback regulation of the stress response can broadly be categorized as either central or peripheral depending upon the site of glucocorticoid signaling involved. Given the importance of GRs in mediating negative feedback control, the majority of research to date has focused on variation in the distribution and concentration of MRs and GRs within the HPA axis (Breuner and Orchinik, 2001; Canoine et al., 2007; Harris et al., 2013; de Kloet, 2014; Krause et al., 2015; Cornelius et al., 2018); other mechanisms of stress axis modulation have received comparatively little attention.

Of particular interest is enzymatic control of glucocorticoid synthesis/regeneration and localized inactivation. Adrenal generation of active glucocorticoids from cholesterol ends with the conversion of

<sup>1</sup>Department of Neurobiology, Physiology and Behavior, University of California Davis, One Shields Avenue, Davis, CA 95616, USA. <sup>2</sup>The Institute of Biodiversity, Animal Health & Comparative Medicine, University of Glasgow, Glasgow, G12 8QQ, UK. <sup>3</sup>The Roslin Institute, The Royal (Dick) School of Veterinary Studies, University of Edinburgh, Easter Bush, Midlothian, EH25 9RG, UK. <sup>4</sup>Center for Macroecology, Evolution and Climate, Natural History Museum of Denmark, University of Copenhagen, Universitetsparken 15, DK-2100 Copenhagen, Denmark. <sup>5</sup>MRC HGU, Institute of Genetics and Molecular Medicine, University of Edinburgh, Western General Hospital, Edinburgh, EH4 2XU, UK.

\*Author for correspondence (Jonathan.Perez@glasgow.ac.uk)

 J.H.P., 0000-0003-0449-7782

**List of abbreviations**

|                 |                                          |
|-----------------|------------------------------------------|
| 11 $\beta$ -HSD | 11 beta-hydroxysteroid dehydrogenase     |
| ACTH            | adrenocorticotropin                      |
| CRF             | corticotropin releasing factor           |
| DETC            | sodium diethyldithiocarbamate trihydrate |
| GR              | glucocorticoid receptor                  |
| HPA axis        | hypothalamic–pituitary–adrenal axis      |
| MET             | 2-methyl-1,2-di-3-pyridyl-1-propanone    |
| MR              | mineralocorticoid receptor               |
| PVN             | paraventricular nucleus                  |

deoxy forms (deoxycorticosterone or 11-deoxycortisol) to active glucocorticoid by the 11 $\beta$ -hydroxylase enzyme. The liver also serves as a secondary source of glucocorticoids through the regeneration of inactive 11-keto-glucocorticoids to glucocorticoids by the enzyme 11 $\beta$ -hydroxysteroid dehydrogenase type 1 (11 $\beta$ -HSD1). Indeed, in humans, regeneration of inactive 11-keto-glucocorticoids has been found to account for up to 40% of glucocorticoid synthesis (Basu et al., 2004). 11 $\beta$ -HSD1 may also serve to mediate local tissue level exposure as it has been reported in an array of mammalian tissue types including the brain, liver, adipose tissue, fat, gonads, vasculature, multiple brain regions, uterus and muscle (Diaz et al., 1998; Holmes and Seckl, 2006; Wyrwoll et al., 2011; reviewed in Chapman et al., 2013). Reports of 11 $\beta$ -HSD1 in avian species are limited, with a single study recording it as undetectable in the brain of zebra finches, *Taeniopygia guttata* (Rensel et al., 2018).

Whereas 11 $\beta$ -HSD1 and 11 $\beta$ -hydroxylase act to synthesize and regenerate inactivated glucocorticoids, respectively, 11 $\beta$ -hydroxysteroid dehydrogenase type 2 (11 $\beta$ -HSD2) serves as a key regulator of local exposure to glucocorticoids at the tissue level by inactivating glucocorticoids to inert metabolites. This is best demonstrated by its well-documented action in the kidneys where inactivation of glucocorticoids by 11 $\beta$ -HSD2 allows aldosterone, instead of glucocorticoids, to bind to the non-selective MRs. Similar to 11 $\beta$ -HSD1 in birds, 11 $\beta$ -HSD2 has been reported to have a relatively limited neural distribution in mammals and is most closely associated with protection of developing tissue from excess glucocorticoid signaling and modulation of neural aldosterone signaling in the adult brain (Wyrwoll et al., 2011). In birds, 11 $\beta$ -HSD2 has been described in the chicken (*Gallus gallus*; Klusoňová et al., 2008) and zebra finch (Katz et al., 2010; Rensel et al., 2018) in the brain, liver, kidney, colon and gonads. The expression of 11 $\beta$ -HSD enzymes in the brain in particular suggests the potential for altering negative feedback control of the hormonal stress response. Similarly, peripheral 11 $\beta$ -HSD is expected to impact rates of clearance and regeneration of glucocorticoids. Together, these dual effects may provide a critical mechanism for maintenance of both plasticity and variation (seasonal and inter-individual) in the functional characteristics of the HPA axis. This is supported by studies in 11 $\beta$ -HSD1 knockout mice that have demonstrated increased glucocorticoid secretion in response to restraint stress (Harris et al., 2001).

The role of regulatory enzymes, both in the periphery and brain, in controlling glucocorticoid levels remains poorly understood in free-living animals, particularly birds. Here, we sought to understand the relative contribution of both peripheral and central inactivation (via 11 $\beta$ -HSD2) and activation (via 11 $\beta$ -HSD1 regeneration and 11 $\beta$ -hydroxylase synthesis) of glucocorticoids in modulating the hormonal stress response. In order to address these major knowledge gaps, we took a multi-step approach utilizing Gambel's white-crowned sparrows, *Zonotrichia leucophrys*

(Nuttall 1840) – a seasonally breeding songbird species with well-characterized stress physiology. First, we quantified mRNA expression of 11 $\beta$ -HSDs across both central and peripheral tissues in both sexes. To test the importance of both central and peripheral enzyme activity, we conducted central and peripheral intracerebroventricular (i.c.v.) administration of pharmacological antagonists targeting both glucocorticoid (hereafter corticosterone, the major glucocorticoid in birds) generation and clearance. To test the contribution of corticosterone synthesis in modulating circulating plasma levels, we utilized the well-characterized blocker of corticosterone synthesis metyrapone (2-methyl-1,2-di-3-pyridyl-1-propanone, MET), shown to block both corticosterone synthesis by 11 $\beta$  hydroxylase and corticosterone regeneration by 11 $\beta$ -HSD1. Simultaneously, we utilized a previously identified selective inhibitor of 11 $\beta$ -HSD2 (Schweizer et al., 2003), sodium diethyldithiocarbamate trihydrate (DETC) to block clearance of corticosterone.

**MATERIALS AND METHODS****Animals**

Gambel's white-crowned sparrows were captured on their wintering grounds near Davis, CA, USA (N 38°33', W 121°44') between 2016 and 2017 using a combination of seed-baited potter traps and Japanese mist nets. In December 2016, photosensitive field-caught birds ( $n=9$  per sex) were euthanized with an overdose of isoflurane and, following confirmation of death, the brain, pituitary gland, gonad, kidney, liver, fat, gastrocnemius muscle, pectoralis muscle, heart and adrenal glands were collected for subsequent RT-PCR analysis. Collected tissues were immediately fresh frozen on dry ice and stored at  $-80^{\circ}\text{C}$  then shipped to the Roslin Institute on dry ice, and stored at  $-70^{\circ}\text{C}$ . Time to death from capture was  $146\pm 5$  s and a baseline blood sample (ca. 70  $\mu\text{l}$ ) was taken from all animals within  $87\pm 7$  s of capture to determine baseline levels of corticosterone. Blood was collected by puncture of the alar vein with a 26 gauge needle and surface blood collected by a heparinized microcapillary tube (41B501; Kimble Chase, Vineland, NJ, USA).

Twenty-eight males and 22 females were sampled in the field for experiment 1 (peripheral 11 $\beta$ -HSD2 regulation) from February to March 2017. In early April 2017, an additional 26 pre-breeding males were captured and transferred to captivity in aviary facilities at the University of California, Davis, for use in experiment 2 (central regulation). Sex was determined by PCR followed by gel electrophoresis as per Griffiths et al. (1998) for free-living birds and by necropsy for captive birds. All procedures were approved by UC Davis Institutional Animal Care and Use Committee (IACUC), protocol no. 19758 and followed UK ARRIVE (ASP) guidelines. In all experiments, birds were randomly assigned to each treatment.

**Determining 11 $\beta$ -HSD mRNA expression**

RNA was extracted from tissues using Zymo DIRECT-zol RNA miniprep kits (Zymo Research, Irvine, CA, USA). Following RNA extraction, the total concentration of RNA was determined via NanoDrop spectrophotometry. RNA input was equalized tissue-wise for reverse transcription to cDNA using a High Capacity cDNA Reverse Transcription Kit (cat. no. 4368814; Life Technologies, Carlsbad, CA, USA) prior to quantification. Quantitative PCR (qPCR) using Brilliant III Ultra-Fast SYBR Green (Agilent Technologies, Santa Clara, CA, USA) in ThermoFast 96-well detection plates (AB1100, ThermoFisher) with optical caps (4323032, ThermoFisher) was used to measure 11 $\beta$ -HSD1 and 11 $\beta$ -HSD2 gene expression. Reactions were performed and samples

**Table 1. qPCR primers utilized in this study**

| Target           | Accession no.  | Forward primer (5'–3') | Reverse primer (5'–3') |
|------------------|----------------|------------------------|------------------------|
| 11 $\beta$ -HSD1 | XM_005492865.1 | GCTCATCTCAACCACATCG    | CCATCTAGGGCGAAGCTTGGT  |
| 11 $\beta$ -HSD2 | XM_005490743.3 | ATATCCAGGCCACACCAAC    | CACGTTGTCCTGTTTTGTAGT  |
| YHWAZ            | NM_001031343.1 | GTGGAGCAATCACACAGGC    | GCGTGCGTCTTTGTATGACTC  |
| NDUFA1           | NM_001302115.1 | ATGTGGTACGAGATCTGCG    | TTCTCCAGACCCTTGACAC    |

counted on a Stratagene MX 3000 machine and relative measurements were calculated using MxPro software by extrapolation to a standard sample series of defined concentration (standard curve), as previously described (Reid and Dunn, 2018). Manual examination of reaction quality involved examination of dissociation curves for a single peak, check of standard curve correlation (>0.995) and confirmation of good reaction efficiency (90–110%). Following quality control, sample size for male gastrocnemius muscle was reduced to 8, and both gonad and pituitary gland to 6 samples for final analysis. All qPCR data were normalized to the geometric mean value of two reference genes: 3-monooxygenase/tryptophan 5-monooxygenase activation protein zeta (*YWHAZ*) and NADH:ubiquinone oxidoreductase subunit A1 (*NDUFA1*). Primers were designed based on NCBI (<https://www.ncbi.nlm.nih.gov>) database entries for available passerine species: white-throated sparrow (*Zonotrichia albicollis*) and zebra finch (*Taeniopygia guttata*). Two potential sequences were examined for 11 $\beta$ -HSD1 based on a search of NCBI databases and were denoted 11 $\beta$ -HSD1-762 (XM\_005495762.2) and 11 $\beta$ -HSD1-865 (previously: XM\_005492865.1). Based on sequencing and homology data, candidate 11 $\beta$ -HSD1-865 (hereafter referred to as 11 $\beta$ -HSD1) was determined to correctly represent 11 $\beta$ -HSD1 and used for subsequent tissue analysis. Single sets of primers were designed for 11 $\beta$ HSD2 (XM\_005490743.3), YHWAZ (NM\_001031343.1) and NDUFA1 (NM\_001302115.1). All primers were validated via standard PCR of *Z. leucophrys gambelii* cDNA and amplicons sequenced to confirm identity. See Table 1 for details of primers used.

### Antagonists

MET (96%; M2696, Sigma-Aldrich) and DETC (D3506, Sigma-Aldrich) were freshly prepared in Ringer's lactate (RL) solution (0.9%) to provide an injection volume of 100–200  $\mu$ l at the desired dosage: MET high dose 30 mg kg<sup>-1</sup>, MET low dose 15 mg kg<sup>-1</sup>, DETC high dose 400 mg kg<sup>-1</sup>, and DETC low dose 200 mg kg<sup>-1</sup>. DETC has been shown to be a selective inhibitor of 11 $\beta$ -HSD2 with an IC<sub>50</sub> of 6.3 $\pm$ 3.8  $\mu$ mol l<sup>-1</sup> and no detectable activity with respect to both reduction and oxidation reactions catalyzed by 11 $\beta$ -HSD1 (Schweizer et al., 2003).

### Experiment 1: effects of peripheral antagonist injection on the corticosterone stress response

Immediately following capture (within 3 min), a baseline blood sample (ca. 70  $\mu$ l) was obtained as described above. Birds were weighed by Pesola spring scale to the nearest 0.1 g to determine appropriate drug dosage. Birds were randomly assigned to one of five treatment groups: high-dose MET (30 mg kg<sup>-1</sup>; n=11), low-dose MET (15 mg kg<sup>-1</sup>; n=12), high-dose DETC (400 mg kg<sup>-1</sup>; n=13), low-dose DETC (200 mg kg<sup>-1</sup>; n=9) or control (100  $\mu$ l of RL solution; n=13) via i.p. injection. Birds were held under a standardized capture restraint protocol in an opaque cloth bag for 60 min, with additional blood samples collected at 10, 30 and 60 min (Astheimer et al., 1992). Each bird was banded with a unique US Fish and Wildlife Service band prior to release.

### Experiment 2: effects of central antagonist administration on the corticosterone stress response

Birds were initially housed in two large flight aviaries (3 $\times$ 2.5 $\times$ 2 m) on an 11 h light:13 h dark photoperiod for acclimation. A total of 24 birds were utilized in the experiment as described below. A 3:1 mixture of Mazuri Small Bird Maintenance Diet (56A6, Mazuri, Richmond, IN, USA) and mixed wild bird seed along with water and grit were provided *ad libitum*. After 30 days, birds were transferred to individual cages (35 $\times$ 25 $\times$ 40 cm) and housed in groups of 3–4 in sound chambers on a fixed photoperiod of 10 h light:14 h dark for the remainder of the experiment.

Birds were cannulated as previously described (Bentley et al., 2006). Birds were food deprived 2 h prior to surgery, anesthetized with 2–4% isoflurane with supplemental oxygen (1 l min<sup>-1</sup>) and placed into a stereotaxic apparatus specially designed for songbirds (<https://www.leicabiosystems.com/research/neuroscience/myneurolab-stereotaxic-news-details/>). The intersection of the mid-sagittal and transverse sinuses was located on the skull and served as a reference point. An 11 mm 26 gauge guide cannula (C315G; Plastics One, Roanoke, VA, USA) was moved 2.3 mm anterior from the reference point, lowered 6 mm below the surface of the skull and bonded in place with dental cement (NC9655090, Stoelting Wood Dale, IL, USA); this was allowed adequate curing time before the animal was removed from the stereotaxic frame. A 33 gauge dummy cannula (C315DC; Plastics One) was inserted into the guide cannula to prevent the development of obstruction. Patency of the cannula was determined by administration of human angiotensin II (A9525, Sigma-Aldrich), which rapidly promotes thirst and drinking behavior within 2 min of infusion (Wada et al., 1975; Richardson and Boswell, 1993). Only birds that drank within 2 min following administration of 1  $\mu$ g of angiotensin II in 2  $\mu$ l of sterile RL solution were included in experimental treatments.

Birds were divided into three groups (n=8 per group per round), which initially received one of the following treatments: control (0.9% sterile saline), MET (20  $\mu$ g) or DETC (200  $\mu$ g) administered in a 2  $\mu$ l bolus infusion over 2 min by infusion pump (PHD 2000, Harvard Apparatus, Holliston, MA, USA). Central administration was carried out using a 10  $\mu$ l Hamilton syringe attached to a clear piece of polyethylene tubing marked to show 1  $\mu$ l volumes. The injection cannula (C315I; Plastics One) protruded 0.5 mm past the end of the guide cannula, allowing central administration into the third ventricle. Birds were assigned to initial treatments such that each chamber received a mix of treatments. Birds were subsequently rotated through each treatment condition so all birds experienced each treatment over the 3 week experimental period. Upon opening of each sound chamber, a baseline blood sample (approximately 50  $\mu$ l) was collected from the alar vein within 3 min or less (as previously described), prior to administration of the appropriate i.c.v. infusion. Additional 50  $\mu$ l blood samples were collected at 10, 30 and 60 min post-disturbance. Two birds per chamber were infused and sampled each day, such that all birds were sampled in a 2 day period each week. Sampling order was reversed each week.



### Blood sample processing

All blood samples were stored on ice until processing. Plasma was separated from red blood cells by centrifuging at 10,000 rpm for 5 min. The plasma was then aspirated via a Hamilton syringe and placed into microcentrifuge tubes and stored at  $-30^{\circ}\text{C}$  until corticosterone quantification.

### Corticosterone radioimmunoassay

Corticosterone levels were measured by a radioimmunoassay as previously described (Wingfield et al., 1992). Briefly, 15  $\mu\text{l}$  of plasma from baseline samples and 10  $\mu\text{l}$  of the post-capture time points were assayed. Recovery efficiency was estimated by adding 2000 c.p.m. of tritiated corticosterone (NET399250UC, Perkin Elmer, Waltham, MA, USA) to each sample prior to extraction. Corticosterone was extracted from the samples by incubation with 4 ml of re-distilled dichloromethane with regular vortexing (D154–4, Fisher Chemical, Pittsburgh, PA, USA). The aqueous phase was then extracted into a clean 10 ml test tube and the samples were dried in a water bath at  $35^{\circ}\text{C}$  under nitrogen gas, prior to being reconstituted using 550  $\mu\text{l}$  of phosphate-buffered saline gelatin. The reconstituted samples were separated into 200  $\mu\text{l}$  duplicate aliquots for quantification and 100  $\mu\text{l}$  was retained for determination of recovery efficacy. Recovery samples were combined with 2 ml of scintillation fluid (Ultima Gold: 6013329, Perkin Elmer) and counted to determine the percentage recovery for each sample; 100  $\mu\text{l}$  of tritiated corticosterone and 100  $\mu\text{l}$  antiserum (07-120016, lot 3R3-PB-20E, MP Biomedical, Santa Ana, CA, USA) were added to each duplicate assay tube and incubated overnight at  $4^{\circ}\text{C}$ . Then, 500  $\mu\text{l}$  of dextran-coated charcoal was added to each duplicate and after exactly 12 min, samples were centrifuged at 3000 rpm for 10 min at  $4^{\circ}\text{C}$ . The supernatant was decanted into scintillation vials and combined with 4 ml of scintillation fluid (Ultima Gold: 6013329, Perkin Elmer). Samples were placed on a Beckman 6500 liquid scintillation counter and each vial was counted for 5 min or within 2% accuracy. The corticosterone values were determined from a standard curve and adjusted using the corresponding recovery percentage. Mean recoveries were 82.7% and intra-assay [calculated using coefficient of variation (CV) between duplicates] and inter-assay variations were 7.25% and 10.87%, respectively. The detection limit of the assays was  $8.85 \pm 0.49$  pg per tube ( $\sim 0.7$  ng  $\text{ml}^{-1}$  per tube).

### Statistical analyses

All statistical analyses were performed in R (<http://www.R-project.org/>) using packages: *practica* (<https://CRAN.R-project.org/package=practica>), *ggplot2* (Wickham, 2009; <https://CRAN.R-project.org/package=ggplot2>), *lme4* (<https://CRAN.R-project.org/package=lme4>), *lmerTest* (<https://CRAN.R-project.org/package=lmerTest>), *emmeans* (<https://CRAN.R-project.org/package=emmeans>) and *tidyr* (<https://CRAN.R-project.org/package=tidyr>). Normalized gene expression data were analyzed by ANOVA and *post hoc* testing was performed using Tukey's honestly significant difference tests. Sex differences between tissues were not tested based on the absence of main or interaction effects of sex. For the peripheral injection study, the data for low and high doses of DETC and MET were compared via a linear mixed effects model with a dose by handling time interaction individually to determine any dose effect. As no significant main effect (DETC:  $F_{1,66}=1.77$ ,  $P=0.188$ ; MET:  $F_{1,35}=0.18$ ,  $P=0.674$ ) of dose nor any interaction with restraint time (DETC:  $F_{1,64}=0.001$ ,  $P=0.975$ ; MET:  $F_{1,60}=0.09$ ,  $P=0.764$ ) was found, the dosages were combined for each drug for all subsequent analyses. Subsequently, a fully parameterized linear mixed effects model of treatment, restraint time and sex and all

**Table 2. Summary of final mixed effects models used in statistical analyses**

| Model                           | Fixed effects      | Random effects |
|---------------------------------|--------------------|----------------|
| Peripheral time series          | Time $\times$ drug | Bird ID, assay |
| Peripheral area under the curve | Drug               | Assay          |
| Central time series             | Time $\times$ drug | Bird ID, assay |
| Central area under the curve    | Drug               | Bird ID, assay |

interactions was tested and no effect of sex or interaction was detected. This model returned as rank deficient; thus, a second model with the main effect of treatment, restraint time and sex as well as the interaction of treatment and restraint time was tested and again sex was found to be non-significant ( $F_{2,51}=1.83$ ,  $P=0.172$ ) and thus sex was excluded from further analyses. A final base model of the interaction of restraint time and treatment (MET, DETC and saline) with both band number (unique identifier) and corticosterone assay number included as random intercepts to account for repeated sampling and intra-assay variation, respectively, was used. The dosage of the drug had no effect for MET ( $F_{1,22}=0.12$ ,  $P=0.85$ ) or DETC ( $F_{1,18}=2.58$ ,  $P=0.12$ ) in field samples; thus, in both cases dosages were combined to increase statistical power. Following detection of a significant effect in the linear mixed effects model, *post hoc* tests were performed using estimated marginal means with Tukey's honestly significant difference and Kenward–Roger estimation of degrees of freedom in the *emmeans* package. Integrated corticosterone was determined by calculation of area under the curve using the function *trapz* in the *pracma* package in R. Integrated corticosterone was analyzed by linear mixed effects model with fixed effect of drug and random effects matched to experimental design (see Table 2 for final models). All data are reported as the mean $\pm$ s.e.m.

## RESULTS

### 11 $\beta$ -HSD gene expression

*11 $\beta$ -HSD1* and *11 $\beta$ -HSD2* mRNA were detected across tissues (Figs 1 and 2). *11 $\beta$ -HSD1* expression differed significantly between tissues (Fig. 1;  $F_{10,169}=54.94$ ,  $P<0.001$ ) and tissue level expression patterns varied by sex ( $F_{1,169}=2.60$ ,  $P=0.006$ ). Expression of *11 $\beta$ -HSD1* was highest in the liver for both sexes (Fig. 1), though sexes differed significantly from each other ( $F_{1,169}=0.339$ ,  $P<0.001$ ). *11 $\beta$ -HSD1* expression was detected in the hippocampus, hypothalamus and anterior pituitary gland, but was close to the lower limit of detection in all three tissues (Fig. 1). *11 $\beta$ -HSD2* expression also differed significantly between tissues (Fig. 2;  $F_{10,170}=63.24$ ,  $P<0.001$ ), but no effect of sex ( $F_{1,170}=1.33$ ,  $P=0.251$ ) nor sex by tissue interaction was detected ( $F_{10,170}=1.41$ ,  $P=0.181$ ). As with *11 $\beta$ -HSD1* expression, *11 $\beta$ -HSD2* expression was low but present in the hippocampus, hypothalamus and anterior pituitary (Fig. 2).

### Experiment 1: effects of peripheral antagonist injection on the corticosterone stress response

The final model consisted of restraint time, treatment and their interaction with the random effect of bird. Corticosterone was found to increase independent of treatment with duration of restraint stress (Fig. 3A;  $F_{1,200}=103.98$ ,  $P<0.001$ ). Treatment also significantly altered plasma corticosterone levels ( $F_{2,200}=7.22$ ,  $P<0.001$ ). DETC treatment resulted in significant elevation of corticosterone at 10 min compared with levels following MET treatment (DETC–MET:  $t_{171}=5.47$ ,  $P<0.001$ ), at 30 min compared with both saline and MET groups (DETC–saline:  $t_{169}=4.36$ ,  $P<0.001$ ;

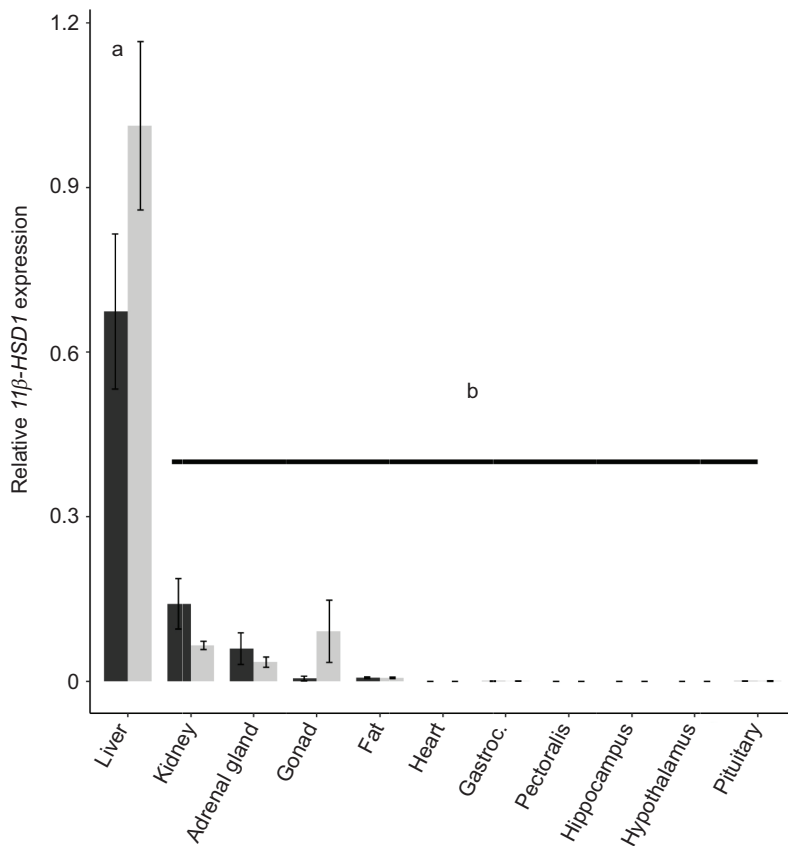

**Fig. 1. Relative expression of  $11\beta$ -HSD1 mRNA in Gambel's white-crowned sparrows across multiple tissues.** Expression was measured by reverse transcription followed by qPCR in female (black) and male (gray) non-breeding birds. Different letters indicate significant differences ( $P < 0.05$ ) between tissues as determined by *post hoc* testing (Tukey's HSD).  $n = 9$  per sex per tissue, except for male gastrocnemius muscle  $n = 8$ , gonad  $n = 6$ , and anterior pituitary  $n = 6$ . Expression was standardized against the geometric mean of *YWHAZ* and *NDUFA* reference gene expression. Values are expressed as means  $\pm$  s.e.m.

DETC–MET:  $t_{174} = 9.23$ ,  $P < 0.001$ ), and at 60 min compared with MET treatment ( $t_{174} = 3.04$ ,  $P = 0.007$ ). Peripheral injection of MET resulted in decreased corticosterone compared with control at 30 min ( $t_{171} = -3.36$ ,  $P = 0.003$ ).

Total integrated corticosterone secreted over the 1 h restraint period, as calculated by area under the curve, was affected by treatment (Fig. 3B;  $F_{2,45} = 25.9$ ,  $P < 0.001$ ). DETC significantly increased corticosterone compared with control ( $t_{45} = 3.15$ ,  $P = 0.008$ ) and MET ( $t_{45} = 7.17$ ,  $P < 0.001$ ) treatment. MET treatment reduced total corticosterone secreted compared with control ( $t_{45} = -2.88$ ,  $P = 0.017$ ).

### Experiment 2: effects of central antagonist administration on the corticosterone stress response

Corticosterone concentrations increased over the 60 min restraint period across treatments (Fig. 3C;  $F_{1,192} = 45.8$ ,  $P < 0.001$ ). The increase of corticosterone concentrations over time was found to be dependent upon the drug infused ( $F_{2,192} = 4.14$ ,  $P = 0.02$ ). There were no differences between treatments at the 0 and 10 min time points. DETC-treated birds had significantly higher corticosterone at 30 min (Fig. 3B; DETC–saline:  $t_{193} = 4.81$ ,  $P < 0.001$ ; DETC–MET:  $t_{188} = 3.38$ ,  $P = 0.04$ ) and 60 min post-restraint (DETC–saline:  $t_{193} = 3.37$ ,  $P = 0.02$ ; DETC–MET:  $t_{188} = 3.53$ ,  $P = 0.026$ ). Corticosterone concentration in response to MET infusion did not differ from control at any time point ( $P \geq 0.05$ ).

Total corticosterone secreted showed a trend towards being affected by the drug infused (Fig. 3D;  $F_{2,31} = 2.68$ ,  $P = 0.084$ ). However, *post hoc* testing detected no difference between treatment groups in total corticosterone secreted, though DETC infusion ( $t_{36} = 1.79$ ,  $P = 0.19$ ) showed a trend towards increasing corticosterone as compared with control when inspected graphically.

## DISCUSSION

### $11\beta$ -HSD gene expression

Detection of  $11\beta$ -HSD expression across tissues supports a functional role in the regulation of tissue-specific and circulating corticosterone levels in birds. Consistent with previous reports in birds, we found  $11\beta$ -HSD1 expression to be highest in the liver (Rensel et al., 2018) and  $11\beta$ -HSD2 expression to be high in the kidney with detectable levels in the gonads, liver and brain (Klusoňová et al., 2008; Katz et al., 2010; Rensel et al., 2018). This expression across body tissues supports the established major role of  $11\beta$ -HSD1 in the hepatic generation of active glucocorticoids from circulating precursors (Rensel et al., 2018) and  $11\beta$ -HSD2 in the maintenance of renal aldosterone signaling via protection of MRs from corticosterone binding.

For the first time, we report expression of both  $11\beta$ -HSD1 and  $11\beta$ -HSD2 in the adrenal glands of a bird. While the presence of  $11\beta$ -HSD1 in the adrenal gland is expected, given its role in corticosterone biosynthesis, the presence of  $11\beta$ -HSD2 is surprising as it inactivates corticosterone. We found  $11\beta$ -HSD2 expression levels here to be 2–3 times higher than in the kidney (the second-highest site of expression). Protection of the adrenal glands from toxic levels of corticosterone and modulation of local autocrine or paracrine feedback loops by  $11\beta$ -HSD2 may explain these findings. This is supported by data from rats and humans showing that adrenal  $11\beta$ -HSD2 expression is concentrated primarily in the zona fasciculata, where glucocorticoid synthesis occurs, with lower expression in the zona reticularis and medulla (Roland and Funder, 1996; Mazzocchi et al., 1998) and none in the capsule and zona glomerulosa (the site of mineralocorticoid synthesis). Mazzocchi and colleagues (1998) also found  $11\beta$ -HSD2 activity in human adrenal preparations to be indirectly

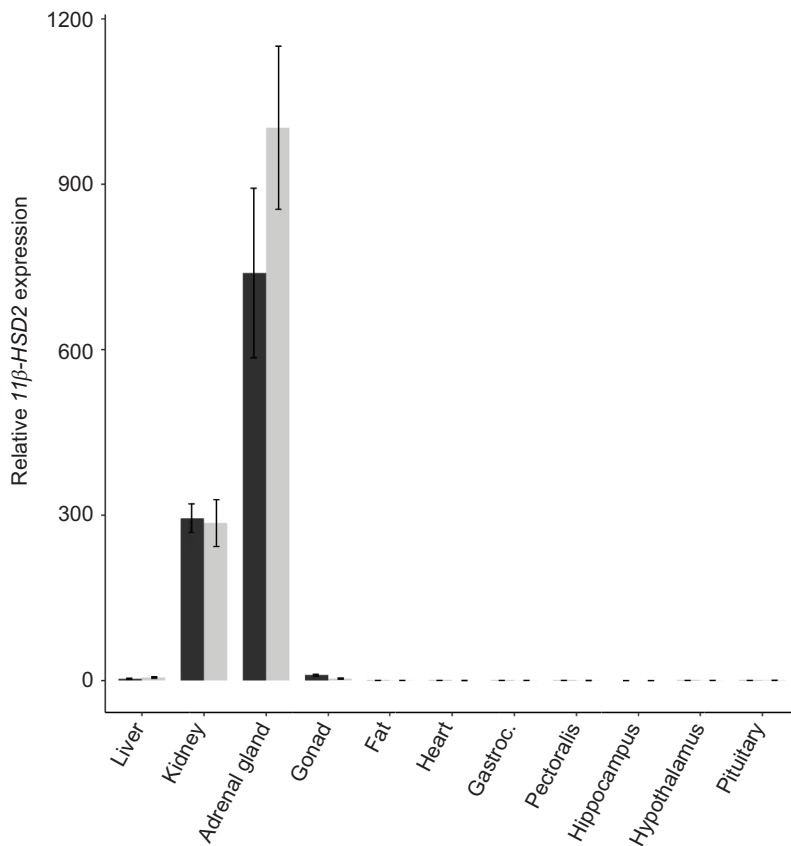

**Fig. 2. Relative expression of putative 11β-HSD2 mRNA in Gambel's white-crowned sparrows across multiple tissues.** Expression was measured by reverse transcription followed by qPCR in female (black) and male (gray) non-breeding birds. Different letters indicate significant differences ( $P < 0.05$ ) between tissues as determined by *post hoc* testing.  $n = 9$  per sex per tissue, except for male gastrocnemius muscle  $n = 8$ , gonad  $n = 7$ , and anterior pituitary  $n = 6$ . Expression was standardized against *YWHAZ* and *NDUFA* reference gene expression. Values are expressed as means  $\pm$  s.e.m.

responsive to exogenous ACTH. This modulation of adrenal 11β-HSD2 and its distribution suggests the possibility of dynamic modulation of glucocorticoid production within the adrenal gland itself over the course of the stress response. Such modulation of glucocorticoid secretion by adrenal 11β-HSD2 remains to be tested in avian systems.

Hypothalamic expression of both 11β-HSD enzymes was low compared with expression in peripheral tissues. These results are consistent with previous studies in zebra finches (Katz et al., 2010; Rensel et al., 2018). Zebra finch *11β-HSD2* expression was found to be widespread across the brain, and has been suggested to be driven by the widespread neural expression of MRs in this species as compared with mammals and other birds (Katz et al., 2010). The present study lacks the necessary data to test this hypothesis and whether it is a unique feature of zebra finches.

#### Peripheral and central MET administration

Our findings suggest that MET efficacy may be context and species dependent as peripheral administration had minimal detectable effect. Previous studies have demonstrated the efficacy of MET in inhibiting corticosterone synthesis in rodents, with a dose of  $40 \text{ mg kg}^{-1}$  generating robust suppression in rats (Herman et al., 1992). Previous studies in birds, utilizing implants to deliver MET in a time-released manner, had no prolonged effect on corticosterone levels in house sparrows (Gray et al., 1990; Aharon-Rotman et al., 2017). Though this may be taken to suggest that MET simply lacks efficacy in avian species, the lowest levels of circulating corticosterone were found to occur 2 days after implant placement, with levels rising over the course of the study (Aharon-Rotman et al., 2017). This suggests that MET implants are able to alter basal corticosterone levels, but that these

alterations are unable to overcome homeostatic control in the long run. These results combined with the findings of the present study support a limited efficacy of MET in disrupting the generation of corticosterone in birds. The single short-term bolus injection approach used in this study may have enabled us to better detect the effects of MET. However, our data also suggest that MET has a very limited ability to alter corticosterone levels in birds. Further interpretation of MET's specific actions is limited at present. Additional studies are necessary to disentangle the role of 11β-hydroxylase action from that of 11β-HSD1.

#### Inhibition of 11β-HSD2 by peripheral and central DETC administration

Peripheral administration of DETC effectively blocked 11β-HSD2 action, as evidenced by the increase in circulating corticosterone (Fig. 3A,B) as predicted by previous cell-based assays utilizing DETC (Atanasov et al., 2003; Schweizer et al., 2003). This suggests that peripheral 11β-HSD2, in addition to providing localized protection at the level of the target tissue, also serves to modulate circulating levels of corticosterone. Of particular interest in this respect is the high level of *11β-HSD2* expressed in the adrenal glands, previously unreported in songbirds. Contrary to our *a priori* predictions, central DETC administration also resulted in elevated circulating corticosterone levels over the restraint period (Fig. 3C). The blocking of hypothalamic 11β-HSD2 was expected to lead to a local elevation of corticosterone, thereby increasing negative feedback and ultimately lowering the total amount of corticosterone secreted or at least increasing the speed at which corticosterone returned to baseline. Instead, we saw a trend towards increased total corticosterone secretion in response to DETC infusion into the third ventricle (Fig. 3D). Examination of the

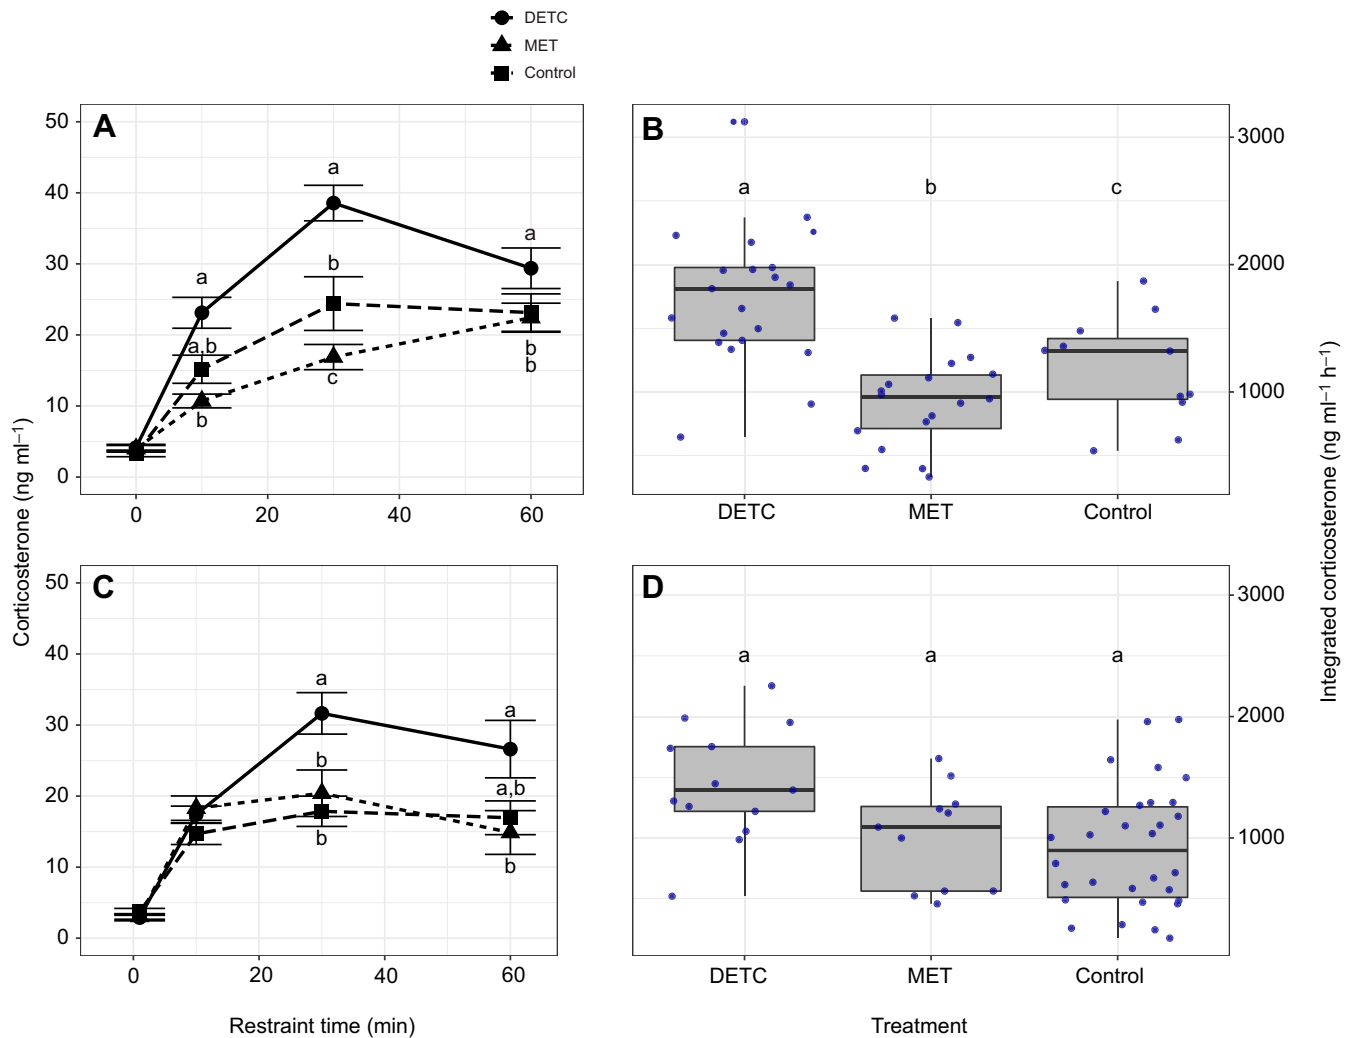

**Fig. 3. Effects of MET and DETC on plasma concentrations of corticosterone.** Corticosterone synthesis was inhibited by MET and  $11\beta$ -HSD2 clearance of corticosterone was inhibited by DETC. (A,B) Effects of a single bolus peripheral injection of MET (combined 15 and 30 mg kg<sup>-1</sup> data;  $n=21$ ) or DETC (combined 200 and 400 mg kg<sup>-1</sup> data;  $n=21$ ) versus controls (100  $\mu$ l of Ringer's lactate solution;  $n=12$ ) on (A) plasma corticosterone concentrations over a 1 h handling restraint sampling period and (B) integrated hormonal response using integrated area under the curve (AUC). Dose had no effect on corticosterone so samples were pooled. (C,D) Effects of central infusion of MET (90 nmol;  $n=11$ ) and DETC (900 nmol;  $n=13$ ) versus control ( $n=30$ ), into the third ventricle on (C) corticosterone concentrations over a 1 h sampling period and (D) integrated AUC over the same period. Values in A and C are means  $\pm$  s.e.m.; boxplots in B and D show median (central line), 25th and 75th percentiles (box limits), s.d. (whiskers), raw data points (blue filled dots) and outliers (circles). Data were analyzed by linear mixed effects model, with Tukey's HSD *post hoc* test. Different letters indicate significant differences ( $P<0.05$ ) between treatments at a given time point.

present data in light of the broader literature, including the ability of DETC to cross the blood–brain barrier (Frank et al., 1995), supports two broad hypotheses. First, the escape of centrally injected DETC into the periphery to act upon the major sites of corticosterone inactivation, the kidney and liver. While physically possible, the small volume of i.c.v. DETC (representing a comparatively tiny absolute DETC dosage in comparison to the peripheral injections) makes the escape of centrally administered DETC to the periphery a highly unlikely explanation. Alternatively, DETC within the brain may inhibit as yet uncharacterized sites of neural stress axis regulation, that in the absence of the normal  $11\beta$ -HSD2 protective action triggers positive feedback, supporting the further release of corticosterone. Future studies utilizing labeled corticosterone to determine tissue-level processing in response to antagonist treatment will be necessary to elucidate the role  $11\beta$ -HSD2 in the regulation of the stress axis. Furthermore, conditional knockout

models may provide a robust alternative, but are presently not widely available in avian systems.

#### Role of $11\beta$ -HSD2 enzymes in the regulation of the stress response

Our findings support a critical role for  $11\beta$ -HSD2 in the regulation of circulating levels of corticosterone. The high peripheral gene expression and clear reduction in systemic clearance observed in response to peripheral blocking of  $11\beta$ -HSD2 suggest that peripheral  $11\beta$ -HSD2 action contributes more to regulation of the hormonal stress response than does central  $11\beta$ -HSD2 activity, if this indeed exists. It is critical to recall that the presence of  $11\beta$ -HSD2 in multiple peripheral tissues may complicate interpretation of plasma levels in response to antagonist treatment because of the potentially opposing effects of  $11\beta$ -HSD2 blockage between tissues. The complexity of  $11\beta$ -HSD action has been previously



highlighted by studies in 11 $\beta$ -HSD1 knockout mice, which display compensatory adrenal hyperplasia and increased basal levels of corticosterone, despite the presumed absence of hepatic corticosterone reactivation from cortisone (Kotelevtsev et al., 1997). Additionally, in that study it was found that the adrenal glands continued to effectively secrete corticosterone in 11 $\beta$ -HSD1 knockout animals, which also displayed increased adrenal sensitivity to ACTH stimulation. While the results of our present study support the clear involvement of peripheral tissue 11 $\beta$ -HSD2 in the regulation of circulating corticosterone levels, the study design prevents the disentanglement of the contribution of 11 $\beta$ -HSD2 from specific tissues. Development of novel targeted approaches to separate these tissue-specific effects will be critical to advancing our understanding of peripheral corticosterone metabolism.

11 $\beta$ -HSD1 and 11 $\beta$ -HSD2 expression were low in the brain and this is consistent with previous studies in chickens and zebra finches. However, the contribution of 11 $\beta$ -HSD activity in modulating neural negative feedback to the hypothalamus remains unclear. In rats, 11 $\beta$ -HSD2 has been co-localized with GRs and MRs in the brain, suggesting important local regulatory action by these enzymes (Whorwood et al., 1992). Similar data are lacking in free-living species; such co-localization data are needed to clarify the potential of 11 $\beta$ -HSD enzymes to modulate corticosterone activity. Existing data from avian studies of neural distribution of MRs and GRs may provide some insight, but must be interpreted with caution. Both MRs and GRs appear to be generally widely distributed within the avian brain (Senft et al., 2016; Rensel et al., 2018). In white-crowned sparrows, GRs were strongly expressed in the hypothalamus but concentrated primarily in the PVN and pre-optic areas (Krause et al., 2015). However, caution must be taken when extrapolating from these data as they are drawn from observation of breeding as opposed to wintering (present study) white-crowned sparrows and brain-wide localization of 11 $\beta$ -HSD1 and 11 $\beta$ -HSD2 is still lacking in this species. Regional co-localization by RT-PCR of both MR and GR expression with 11 $\beta$ -HSD2 expression has been found in zebra finches (Rensel et al., 2018). While this supports an active role for 11 $\beta$ -HSD2 in modulating local corticosterone concentrations within the avian brain, the lack of neuroanatomical co-localization precludes determination of a functional relationship between the two proteins.

The present work adds to a growing body of literature that supports a significant role for 11 $\beta$ -HSD2 regulatory enzyme action in mediating localized tissue exposure and basal glucocorticoid levels, in addition to modulation in response to stressors. While complete elucidation of role of 11 $\beta$ -HSD2 in HPA axis modulation remains unexplained, it is clear that 11 $\beta$ -HSD2 is vital in the regulation of tissue-specific exposure to glucocorticoids. Future work addressing tissue- and brain region-specific functional contributions of 11 $\beta$ -HSD enzymes is required to fully explain the roles played in HPA axis regulation.

#### Acknowledgements

We would like to thank Thomas Blackmon, Katrina Macalello and Rebecca Stanley for their assistance with animal care and sampling.

#### Competing interests

The authors declare no competing or financial interests.

#### Author contributions

Conceptualization: J.H.P., R.E.S., H.J.L., S.L.M., J.C.W., J.S.K.; Methodology: J.H.P., J.S.K.; Formal analysis: J.H.P., R.E.S., J.C., V.R.B.; Investigation: J.H.P., R.E.S., H.J.L., J.C., V.R.B., K.R.S., A.M.A.R., J.S.K.; Resources: S.L.M., J.C.W.;

Data curation: J.H.P.; Writing - original draft: J.H.P.; Writing - review & editing: J.H.P., K.R.S., A.M.A.R., S.L.M., J.S.K.; Visualization: J.H.P., R.E.S.; Supervision: J.H.P.; Project administration: J.H.P., S.L.M., J.C.W., J.S.K.; Funding acquisition: S.L.M., J.C.W., J.S.K.

#### Funding

This work was supported by the National Science Foundation Division of Integrative Organismal Systems [IOS 1558049 to J.C.W.] and Roslin Institute strategic grant funding from the Biotechnology and Biological Sciences Research Council [BB/P013759/1 to S.L.M.]. J.C.W. would like to acknowledge the University of California, Davis Endowed Chair in Physiology. The Danish Council for Independent Research (Natur og Univers, Det Frie Forskningsråd) supported the MATCH project [1323-00048B to K.S.] and the Danish National Research Foundation (Danmarks Grundforskningsfond) supported the Center for Macroecology, Evolution and Climate [DNRF96 to K.S.].

#### References

- Aharon-Rotman, Y., Buchanan, K. L., Klaassen, M. and Buttemer, W. A. (2017). An experimental examination of interindividual variation in feather corticosterone content in the house sparrow, *Passer domesticus* in southeast Australia. *Gen. Comp. Endocrinol.* **244**, 93-100. doi:10.1016/j.ygcen.2015.12.010
- Astheimer, L. B., Buttemer, W. A. and Wingfield, J. C. (1992). Interactions of corticosterone with feeding, activity and metabolism in passerine birds. *Ornis Scandinavica* **23**, 355-365. doi:10.2307/3676661
- Atanasov, A. G., Tam, S., Röcken, J. M., Baker, M. E. and Odermatt, A. (2003). Inhibition of 11 $\beta$ -hydroxysteroid dehydrogenase type 2 by dithiocarbamates. *Biochem. Biophys. Res. Commun.* **308**, 257-262. doi:10.1016/S0006-291X(03)01359-7
- Basu, R., Singh, R. J., Basu, A., Chittilapilly, E. G., Johnson, C. M., Toffolo, G., Cobelli, C. and Rizza, R. A. (2004). Splanchnic cortisol production occurs in humans. Evidence for conversion of cortisone to cortisol via the 11 $\beta$ -hydroxysteroid dehydrogenase (11 $\beta$ -HSD) type 1 pathway. *Diabetes* **53**, 2051-2059. doi:10.2337/diabetes.53.8.2051
- Bentley, G. E., Jensen, J. P., Kaur, G. J., Wacker, D. W., Tsutsui, K. and Wingfield, J. C. (2006). Rapid inhibition of female sexual behavior by gonadotropin-inhibitory hormone (GnIH). *Horm. Behav.* **49**, 550-555. doi:10.1016/j.yhbeh.2005.12.005
- Breuner, C. W. and Orchinik, M. (2001). Seasonal regulation of membrane and intracellular corticosteroid receptors in the house sparrow brain. *J. Neuroendocrinol.* **13**, 412-420. doi:10.1046/j.1365-2826.2001.00646.x
- Canoine, V., Fusani, L., Schlinger, B. and Hau, M. (2007). Low sex steroids, high steroid receptors: increasing the sensitivity of the nonreproductive brain. *Dev. Neurobiol.* **67**, 57-67. doi:10.1002/dneu.20296
- Chapman, K., Holmes, M. and Seckl, J. R. (2013). 11 $\beta$ -hydroxysteroid dehydrogenases: intracellular gate-keepers of tissue glucocorticoid action. *Physiol. Rev.* **93**, 1139-1206. doi:10.1152/physrev.00020.2012
- Cornelius, J. M., Perreau, G., Bishop, V. R., Krause, J. S., Smith, R., Hahn, T. P. and Meddle, S. L. (2018). Social information changes stress hormone receptor expression in the songbird brain. *Horm. Behav.* **97**, 31-38. doi:10.1016/j.yhbeh.2017.10.002
- de Kloet, E. R. (2014). From receptor balance to rational glucocorticoid therapy. *Endocrinology* **155**, 2754-2769. doi:10.1210/en.2014-1048
- Diaz, R., Brown, R. W. and Seckl, J. R. (1998). Distinct ontogeny of glucocorticoid and mineralocorticoid receptor and 11 $\beta$ -hydroxysteroid dehydrogenase types I and II mRNAs in the fetal rat brain suggest a complex control of glucocorticoid actions. *J. Neurosci.* **18**, 2570-2580. doi:10.1523/JNEUROSCI.18-07-02570.1998
- Frank, N., Christmann, A. and Frei, E. (1995). Comparative studies on the pharmacokinetics of hydrophilic prolinedithiocarbamate, sarcosinedithiocarbamate and the less hydrophilic diethylidithiocarbamate. *Toxicology* **95**, 113-122. doi:10.1016/0300-483X(94)02890-7
- Gray, J. M., Yarian, D. and Ramenofsky, M. (1990). Corticosterone, foraging behavior, and metabolism in dark-eyed juncos, *Junco hyemalis*. *Gen. Comp. Endocrinol.* **79**, 375-384. doi:10.1016/0016-6480(90)90067-V
- Griffiths, R., Double, M. C., Orr, K. and Dawson, R. J. (1998). A DNA test to sex most birds. *Mol. Ecol.* **7**, 1071-1075. doi:10.1046/j.1365-294x.1998.00389.x
- Harris, H. J., Kotelevtsev, Y., Mullins, J. J., Seckl, J. R. and Holmes, M. C. (2001). Intracellular regeneration of glucocorticoids by 11 $\beta$ -hydroxysteroid dehydrogenase (11 $\beta$ -HSD)-1 plays a key role in regulation of the hypothalamic-pituitary-adrenal axis: analysis of 11 $\beta$ -hsd-1-deficient mice. *Endocrinology* **142**, 114-120. doi:10.1210/endo.142.1.7887
- Harris, A. P., Holmes, M. C., de Kloet, E. R., Chapman, K. E. and Seckl, J. R. (2013). Mineralocorticoid and glucocorticoid receptor balance in control of HPA axis and behaviour. *Psychoneuroendocrinology* **38**, 648-658. doi:10.1016/j.psyneuen.2012.08.007
- Herman, J. P., Schafer, M. K., Thompson, R. C. and Watson, S. J. (1992). Rapid regulation of corticotropin-releasing hormone gene transcription in vivo. *Mol. Endocrinol.* **6**, 1061-1069. doi:10.1210/mend.6.7.1324419



- Holmes, M. C. and Seckl, J. R. (2006). The role of 11 $\beta$ -hydroxysteroid dehydrogenases in the brain. *Mol. Cell. Endocrinol.* **248**, 9-14. doi:10.1016/j.mce.2005.12.002
- Joëls, M., Karst, H., DeRijk, R. and de Kloet, E. R. (2008). The coming out of the brain mineralocorticoid receptor. *Trends Neurosci.* **31**, 1-7. doi:10.1016/j.tins.2007.10.005
- Katz, A., Oyama, R. K., Feng, N., Chen, X. and Schlinger, B. A. (2010). 11 $\beta$ -hydroxysteroid dehydrogenase type 2 in zebra finch brain and peripheral tissues. *Gen. Comp. Endocrinol.* **166**, 600-605. doi:10.1016/j.ygcen.2010.01.016
- Klusoňová, P., Kučka, M., Mikšík, I., Bryndová, J. and Pácha, J. (2008). Chicken 11 $\beta$ -hydroxysteroid dehydrogenase type 2: Partial cloning and tissue distribution. *Steroids* **73**, 348-355. doi:10.1016/j.steroids.2007.11.006
- Kotelevtsev, Y., Holmes, M. C., Burchell, A., Houston, P. M., Schmoll, D., Jamieson, P., Best, R., Brown, R., Edwards, C. R. W., Seckl, J. R. et al. (1997). 11 $\beta$ -Hydroxysteroid dehydrogenase type 1 knockout mice show attenuated glucocorticoid-inducible responses and resist hyperglycemia on obesity or stress. *Proc. Natl Acad. Sci. USA* **94**, 14924. doi:10.1073/pnas.94.26.14924
- Krause, J. S., McGuigan, M. A., Bishop, V. R., Wingfield, J. C. and Meddle, S. L. (2015). Decreases in mineralocorticoid but not glucocorticoid receptor mRNA expression during the short Arctic breeding season in free-living Gambel's white-crowned sparrow (*Zonotrichia leucophrys gambelii*). *J. Neuroendocrinol.* **27**, 66-75. doi:10.1111/jne.12237
- Krause, J. S., Pérez, J. H., Meddle, S. L. and Wingfield, J. C. (2017). Effects of short-term fasting on stress physiology, body condition, and locomotor activity in wintering male white-crowned sparrows. *Physiol. Behav.* **177**, 282-290. doi:10.1016/j.physbeh.2017.04.026
- Mazzocchi, G., Rossi, G. P., Neri, G., Malendowicz, L. K., Albertin, G. and Nussdorfer, G. G. (1998). 11 $\beta$ -Hydroxysteroid dehydrogenase expression and activity in the human adrenal cortex. *FASEB J.* **12**, 1533-1539. doi:10.1096/fasebj.12.14.1533
- Reid, A. M. A. and Dunn, I. C. (2018). Gastrointestinal distribution of chicken gastrin-cholecystokinin family transcript expression and response to short-term nutritive state. *Gen. Comp. Endocrinol.* **255**, 64-70. doi:10.1016/j.ygcen.2017.10.009
- Rensel, M. A., Ding, J. A., Pradhan, D. S. and Schlinger, B. A. (2018). 11 $\beta$ -HSD types 1 and 2 in the songbird brain. *Front. Endocrinol.* **9**, 86. doi:10.3389/fendo.2018.00086
- Reul, J. M. H. M., van den Bosch, F. R. and de Kloet, E. R. (1987). Relative occupation of type-I and type-II corticosteroid receptors in rat brain following stress and dexamethasone treatment: functional implications. *J. Endocrinol.* **115**, 459-467. doi:10.1677/joe.0.1150459
- Richardson, R. D. and Boswell, T. (1993). A method for third ventricular cannulation of small passerine birds. *Physiol. Behav.* **53**, 209-213. doi:10.1016/0031-9384(93)90033-C
- Roland, B. L. and Funder, J. W. (1996). Localization of 11beta-hydroxysteroid dehydrogenase type 2 in rat tissues: in situ studies. *Endocrinology* **137**, 1123-1128. doi:10.1210/endo.137.3.8603583
- Romero, M. L. (2002). Seasonal changes in plasma glucocorticoid concentrations in free-living vertebrates. *Gen. Comp. Endocrinol.* **128**, 1-24. doi:10.1016/S0016-6480(02)00064-3
- Sapolsky, R. M., Romero, L. M. and Munck, A. U. (2000). How do glucocorticoids influence stress responses? Integrating permissive, suppressive, stimulatory, and preparative actions. *Endocr. Rev.* **21**, 55-89. doi:10.1210/er.21.1.55
- Schweizer, R. A. S., Atanasov, A. G., Frey, B. M. and Odermatt, A. (2003). A rapid screening assay for inhibitors of 11 $\beta$ -hydroxysteroid dehydrogenases (11 $\beta$ -HSD): flavanone selectively inhibits 11 $\beta$ -HSD1 reductase activity. *Mol. Cell. Endocrinol.* **212**, 41-49. doi:10.1016/j.mce.2003.09.027
- Senft, R. A., Meddle, S. L. and Baugh, A. T. (2016). Distribution and abundance of glucocorticoid and mineralocorticoid receptors throughout the brain of the great tit (*Parus major*). *PLoS ONE* **11**, e0148516. doi:10.1371/journal.pone.0148516
- Wada, M., Kobayashi, H. and Farner, D. S. (1975). Induction of drinking in the White-crowned Sparrow, *Zonotrichia leucophrys gambelii*, by intracranial injection of angiotensin II. *Gen. Comp. Endocrinol.* **26**, 192-197. doi:10.1016/0016-6480(75)90135-5
- Walker, J. J., Spiga, F., Gupta, R., Zhao, Z., Lightman, S. L. and Terry, J. R. (2015). Rapid intra-adrenal feedback regulation of glucocorticoid synthesis. *J. R. Soc. Interface* **12**, 20140875. doi:10.1098/rsif.2014.0875
- Whorwood, C. B., Franklyn, J. A., Sheppard, M. C. and Stewart, P. M. (1992). Tissue localization of 11 $\beta$ -hydroxysteroid dehydrogenase and its relationship to the glucocorticoid receptor. *J. Steroid Biochem. Mol. Biol.* **41**, 21-28. doi:10.1016/0960-0760(92)90220-D
- Wickham, H. (2009). *ggplot2: Elegant Graphics for Data Analysis*. Springer-Verlag.
- Wingfield, J. C., Vleck, C. M. and Moore, M. C. (1992). Seasonal changes of the adrenocortical response to stress in birds of the Sonoran Desert. *J. Exp. Zool.* **264**, 419-428.
- Wyrwoll, C. S., Holmes, M. C. and Seckl, J. R. (2011). 11 $\beta$ -hydroxysteroid dehydrogenases and the brain: from zero to hero, a decade of progress. *Front. Neuroendocrinol.* **32**, 265-286. doi:10.1016/j.yfrne.2010.12.001
